# Supplementary material
Source: Springer Nature journal article supplement (https://www.springermedizin.de/resource/supplementary/12936_2009_1014_MOESM3_ESM.pdf/9548798)
Supplement: MOESM3 [file 9548798]

**1052**  
households (HH) in survey

**802 (76.2%)**  
HH with **children** under five

**239 (28.8%)**  
HH reporting a **malaria episode**  
in a child under five  
within the last month

**12 (5.0%)**  
No medicine taken internally

**227 (95.0%)**  
Medicine taken internally

**8 (66.75%)**  
Wait for recovery

**1 (8.3%)**  
Consult a priest

**3 (25.0%)**  
Wash with leaves

**183 (80.6%)**  
Modern medicine

**44 (19.4%)**  
Traditional medicine  
only

**108 (59.0%)\***  
Chloroquine

**5 (2.7%)\***  
Amodiaquine

**2 (1.1%)\***  
Quinine

**1 (0.5%)\***  
Sulfadoxine-pyrimethamine

**130 (71.0%)\***  
Antipyretics

**14 (7.7%)\***  
Antibiotics

**10 (5.5%)\***  
Others

**33 (18.0%)\***  
Not named

\*possibility of multiple  
medicine taken

*Note: percentages are calculated from  
the number in the level directly above*
